# Supplementary material
Source: Springer Nature journal article supplement (https://www.springermedizin.de/resource/supplementary/12936_2009_1136_MOESM4_ESM.pdf/9549948)

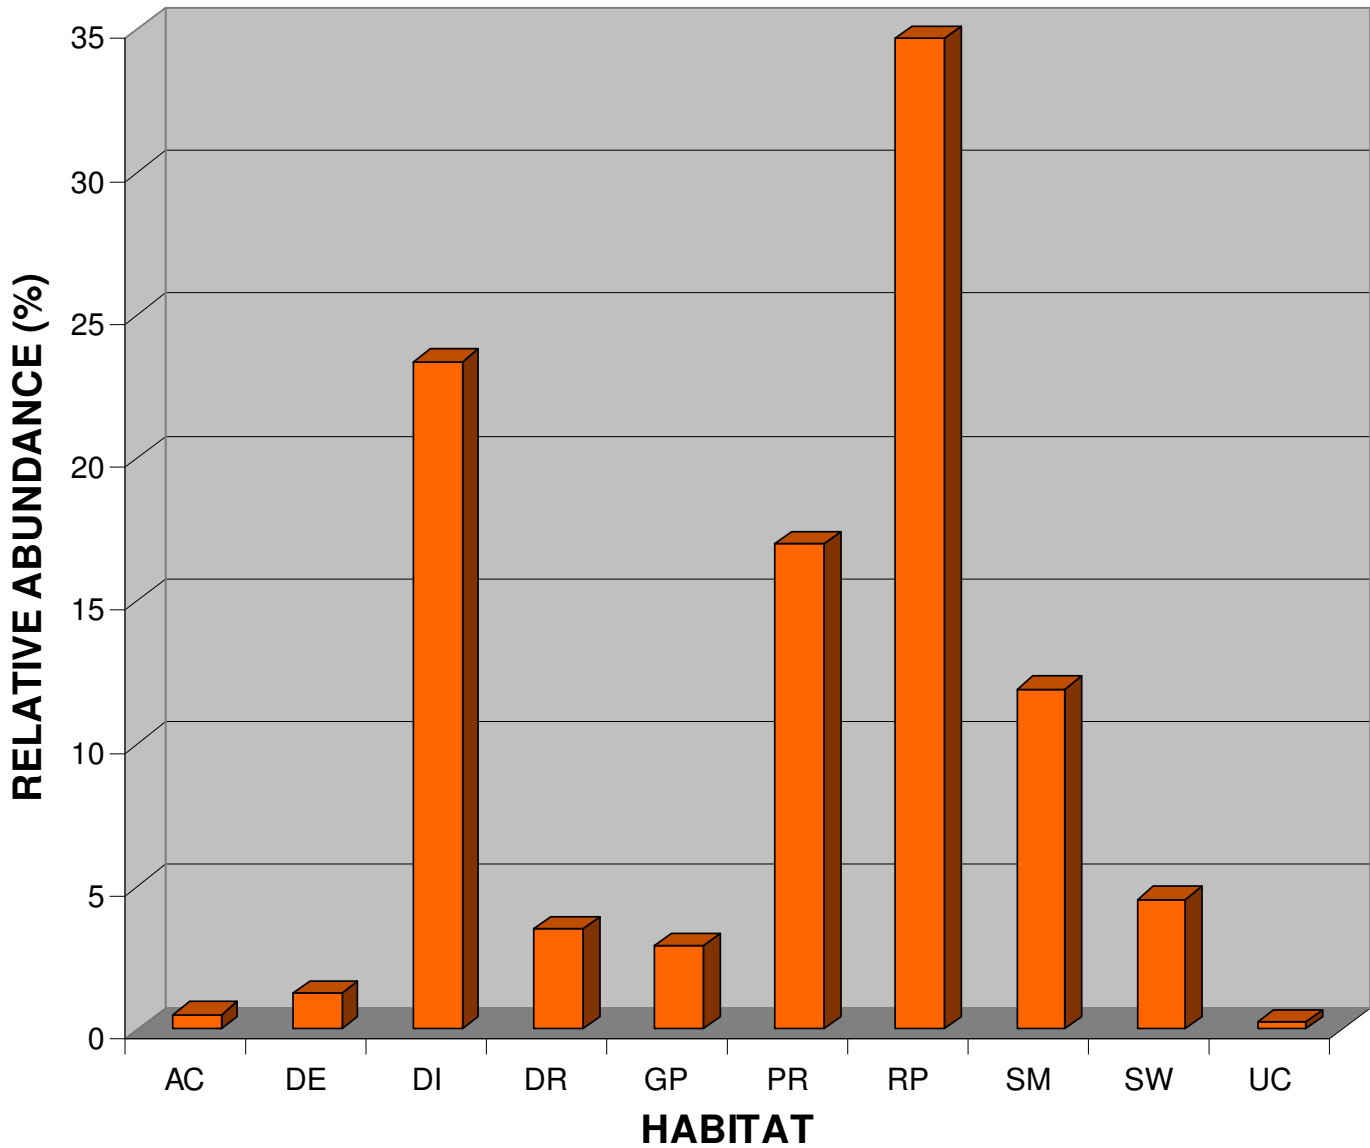

Supplement: MOESM4 [file 9549948]
